# Supplementary material for: Life Cycle Assessment of Bioplastics and Food Waste Disposal Methods
Source: MDPI journal article supplement (doi:10.3390/su13126894), 2021-06-18
Supplement: s1 [file s1]

## Supplementary Materials

**Table S1.** Anaerobic digestion of food waste and bioplastics (scenario 1a) inventory data for waste treatment options.

| Data description                                         | Unit | Unit                   | Source                                                                        |
|----------------------------------------------------------|------|------------------------|-------------------------------------------------------------------------------|
| 1 kg of influent to manage bio-plastic and food waste    | 1    | kg                     | N/A                                                                           |
| <b>Anaerobic digestion untreated</b>                     |      |                        |                                                                               |
| <b>Inputs</b>                                            |      |                        |                                                                               |
| Food waste input                                         | 10%  | Percent by mass        | calculated (Shakira R. Hobbs, Landis, Parameswaran, Astmann, & Devkota, 2016) |
| Anaerobic digested sludge input                          | 89%  | Percent by mass        | calculated (S. R. Hobbs et al., 2016)                                         |
| Polylactic acid input                                    | 1%   | Percent by mass        | calculated (S. R. Hobbs et al., 2016)                                         |
| <b>Outputs</b>                                           |      |                        |                                                                               |
| CH <sub>4</sub> produced                                 | 1%   | Percent by mass        | calculated (S. R. Hobbs et al., 2016)                                         |
| CO <sub>2</sub> produced                                 | 0%   | Percent by mass        | calculated (S. R. Hobbs et al., 2016)                                         |
| Biosolids (sludge)                                       | 29%  | Percent by mass        | calculated (S. R. Hobbs et al., 2016)                                         |
| Biosolids (inert)                                        | 10%  | Percent by mass        | calculated (S. R. Hobbs et al., 2016)                                         |
| PLA output                                               | 1%   | Percent by mass        | calculated (S. R. Hobbs et al., 2016)                                         |
| Influent consumed                                        | 59%  | Percent by mass        | calculated (S. R. Hobbs et al., 2016)                                         |
| <b>Calculation Parameters</b>                            |      |                        |                                                                               |
| Biosolids- food waste                                    | 5%   | Percent of total solid | calculated (Liu & Liptak, 1999)                                               |
| Biosolids-ash from sludge                                | 11%  | Percent of total solid | calculated (Liu & Liptak, 1999)                                               |
| NaOH for Scrubber per CO <sub>2</sub> & H <sub>2</sub> S | 4.3  | gram per gram          | calculated (Tippayawong, Promwungkwa, & Rerkkriangkrai, 2007)                 |
| CO <sub>2</sub> removal efficiency                       | 93%  | Percent by volume      | calculated (Tippayawong et al., 2007)                                         |
| Moisture content                                         | 30%  | Percent by mass        | calculated (Patrick Walsh & O'Leary, 2002)                                    |

**Table S2.** Anaerobic digestion of food waste and pretreated bioplastics (scenario 1b) inventory data for waste treatment options.

| Data description                                      | Unit | Unit            | Source                                |
|-------------------------------------------------------|------|-----------------|---------------------------------------|
| 1 kg of influent to manage bio-plastic and food waste | 1    | kg              | N/A                                   |
| <b>Anaerobic digestion treated</b>                    |      |                 |                                       |
| <b>Inputs</b>                                         |      |                 |                                       |
| Food waste input                                      | 4.6% | Percent by mass | calculated (S. R. Hobbs et al., 2016) |

|                                                          |       |                         |                                                                         |
|----------------------------------------------------------|-------|-------------------------|-------------------------------------------------------------------------|
| Anaerobic digested sludge input                          | 40.2% | Percent by mass         | calculated (S. R. Hobbs et al., 2016)                                   |
| Water                                                    | 48.5% | Percent by mass         | calculated (S. R. Hobbs et al., 2016)                                   |
| HCl input                                                | 3.0%  | Percent by mass         | calculated (S. R. Hobbs et al., 2016)                                   |
| NaOH input                                               | 3.1%  | Percent by mass         | calculated (S. R. Hobbs et al., 2016)                                   |
| PLA input                                                | 0.6%  | Percent by mass         | calculated (S. R. Hobbs et al., 2016)                                   |
| <b>Outputs</b>                                           |       |                         |                                                                         |
| CH <sub>4</sub> produced                                 | 0.3%  | Percent by mass         | calculated (S. R. Hobbs et al., 2016)                                   |
| CO <sub>2</sub> produced                                 | 0.1%  | Percent by mass         | calculated (S. R. Hobbs et al., 2016)                                   |
| Biosolids (sludge)                                       | 13.0% | Percent by mass         | calculated (S. R. Hobbs et al., 2016)                                   |
| Biosolids-ash(inert)                                     | 4.6%  | Percent by mass         | calculated (Liu & Liptak, 1999)                                         |
| Water                                                    | 48.5% | Percent by mass         | calculated (S. R. Hobbs et al., 2016)                                   |
| Influent consumed                                        | 26.9% | Percent by mass         | calculated (S. R. Hobbs et al., 2016)                                   |
| *Chemical outputs                                        | 6.6%  | Percent by mass         | calculated (S. R. Hobbs et al., 2016)                                   |
| <b>Calculation Parameters</b>                            |       |                         |                                                                         |
| Biosolids- food waste                                    | 5%    | Percent of total solid  | calculated (Liu & Liptak, 1999)                                         |
| Biosolids-ash from sludge                                | 13%   | Percent of total solid  | calculated (Liu & Liptak, 1999)                                         |
| NaOH for Scrubber per CO <sub>2</sub> & H <sub>2</sub> S | 4.3   | gram per gram           | calculated (Tippayawong et al., 2007)                                   |
| CO <sub>2</sub> removal efficiency                       | 93%   | Percent by volume       | calculated (Tippayawong et al., 2007)                                   |
| Moisture content                                         | 30%   | Percent by mass         | calculated (Patrick Walsh & O'Leary, 2002)                              |
| P <sub>2</sub> O <sub>5</sub> fertilizer                 | 1%    | g/kg total solid        | calculated (Tambone et al., 2010)                                       |
| K <sub>2</sub> O fertilizer                              | 1%    | g/kg total solid        | calculated (Tambone et al., 2010)                                       |
| N fertilizer                                             | 5%    | Percent of total solids | calculated (Davidsson, Gruvberger, Christensen, Hansen, & Jansen, 2007) |
| Lime stabilization (CaO)                                 | 10%   | Percent by mass         | Calculated, (Shelef, Sukenik, & Green, 1984; Wurtz, 1981)               |

\*Chemical outputs are sodium, hydroxide, lactic acid, hydrogen and chlorine.

**Table S3.** Compost of food waste and bioplastics (scenario 2a) inventory data for waste treatment options.

| Data description                                      | Unit | Unit                   | Source                              |
|-------------------------------------------------------|------|------------------------|-------------------------------------|
| 1 kg of influent to manage bio-plastic and food waste | 1    | kg                     | N/A                                 |
| <b>Compost untreated</b>                              |      |                        |                                     |
| Food waste input                                      | 83%  | Percent by mass        | calculated (Hottle et al., 2016)    |
| PLA input                                             | 17%  | Percent by mass        | calculated (Hottle et al., 2016)    |
| <b>Calculation Parameters</b>                         |      |                        |                                     |
| P <sub>2</sub> O <sub>5</sub> fertilizer              | 1%   | g/kg total solid       | calculated (Tambone et al., 2010)   |
| K <sub>2</sub> O fertilizer                           | 1%   | g/kg total solid       | calculated (Tambone et al., 2010)   |
| N fertilizer                                          | 5%   | percent of total solid | calculated (Davidsson et al., 2007) |

**Table S4.** Compost of food waste and pretreated bioplastic (scenario 2b) inventory data for waste treatment options.

| Data description                                      | Unit | Unit                   | Source                              |
|-------------------------------------------------------|------|------------------------|-------------------------------------|
| 1 kg of influent to manage bio-plastic and food waste | 1    | kg                     | N/A                                 |
| <b>Compost treated</b>                                |      |                        |                                     |
| Food waste input                                      | 67%  | Percent by mass        | calculated (Hottle et al., 2016)    |
| PLA input                                             | 13%  | Percent by mass        | calculated (Hottle et al., 2016)    |
| Soil amendment                                        | 20%  | Percent by mass        | calculated (Hottle et al., 2016)    |
| <b>Calculation Parameters</b>                         |      |                        |                                     |
| P <sub>2</sub> O <sub>5</sub> fertilizer              | 1%   | g/kg total solid       | calculated (Tambone et al., 2010)   |
| K <sub>2</sub> O fertilizer                           | 1%   | g/kg total solid       | calculated (Tambone et al., 2010)   |
| N fertilizer                                          | 5%   | percent of total solid | calculated (Davidsson et al., 2007) |
