# Supplementary material for: Life Cycle Assessment of Bioplastics and Food Waste Disposal Methods
Source: MDPI journal article supplement (doi:10.3390/su13126894), 2021-06-18
Supplement: s1 [file s1]

Archive with 1 entries (1 files):
- sustainability-1214780-supplementary.pdf
